# Supplementary material for: Pseudoexons provide a mechanism for allele-specific expression of APC in familial adenomatous polyposis
Source: PubMed Central journal article supplement (PMC5342583; doi:10.18632/oncotarget.12206), 2016-09-23
Supplement: oncotarget-07-70685-s001.pdf [file oncotarget-07-70685-s001.pdf]

## Pseudoxons provide a mechanism for allele-specific expression of *APC* in familial adenomatous polyposis

### SUPPLEMENTARY FIGURES AND TABLES

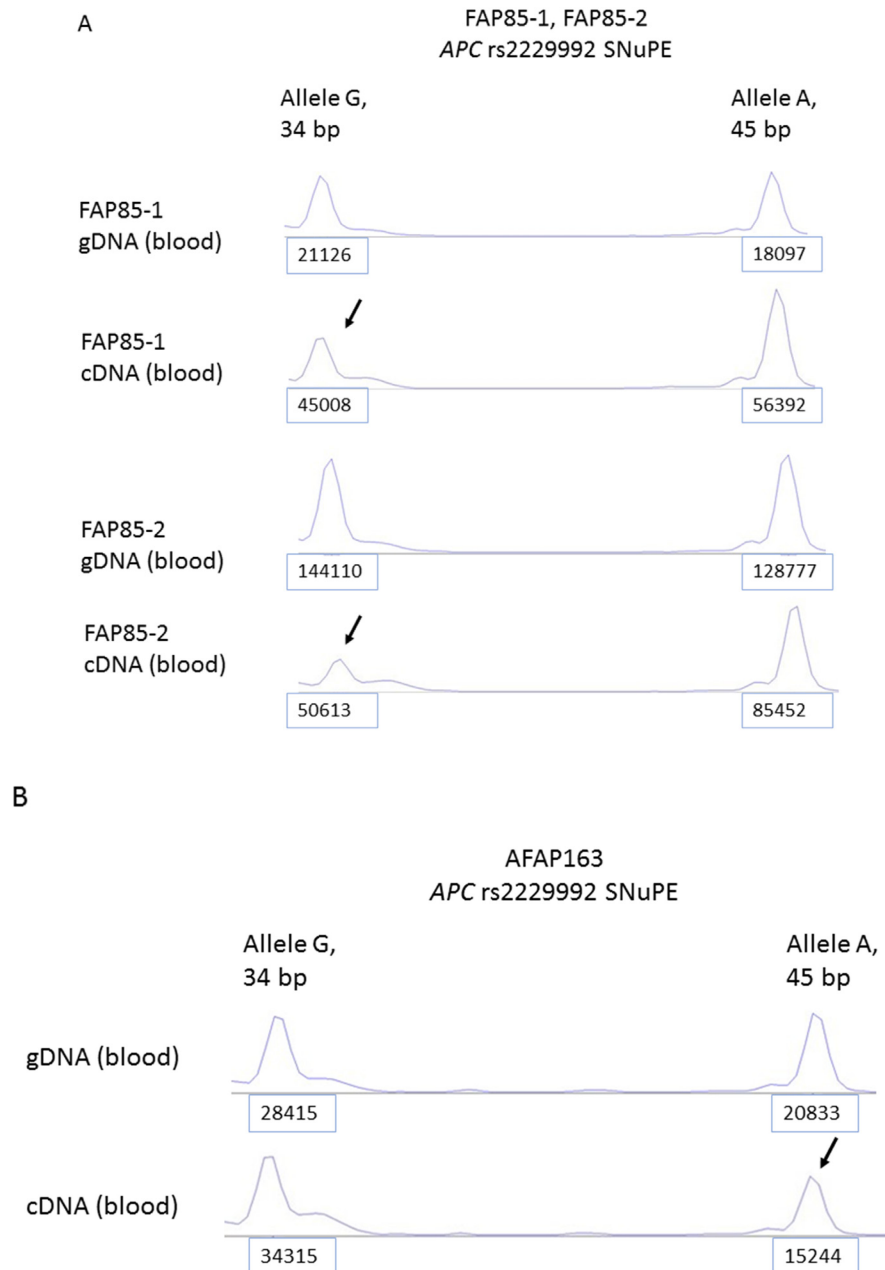

**Supplementary Figure S1: SNUPE analysis to detect ASE of *APC*.** The two *APC* alleles were distinguished based on a SNP from exon 12 (rs2229992) and their dosages assessed in blood-derived complementary DNA (cDNA) reverse transcribed from RNA, compared to genomic DNA (gDNA). Arrows denote the allele with reduced expression. The expression of allele G was decreased compared to allele A in individuals 85-1 and 85-2 from FAP85 (Supplementary Figure 1A) and that of allele A compared to allele G in AFAP163 (Supplementary Figure 1B). The peak ratios of G to A in cDNA relative to gDNA were 0.68 (85-1), 0.53 (85-2), and 1.7 (163) indicating ASE or putative ASE in all three samples (see Materials and Methods).

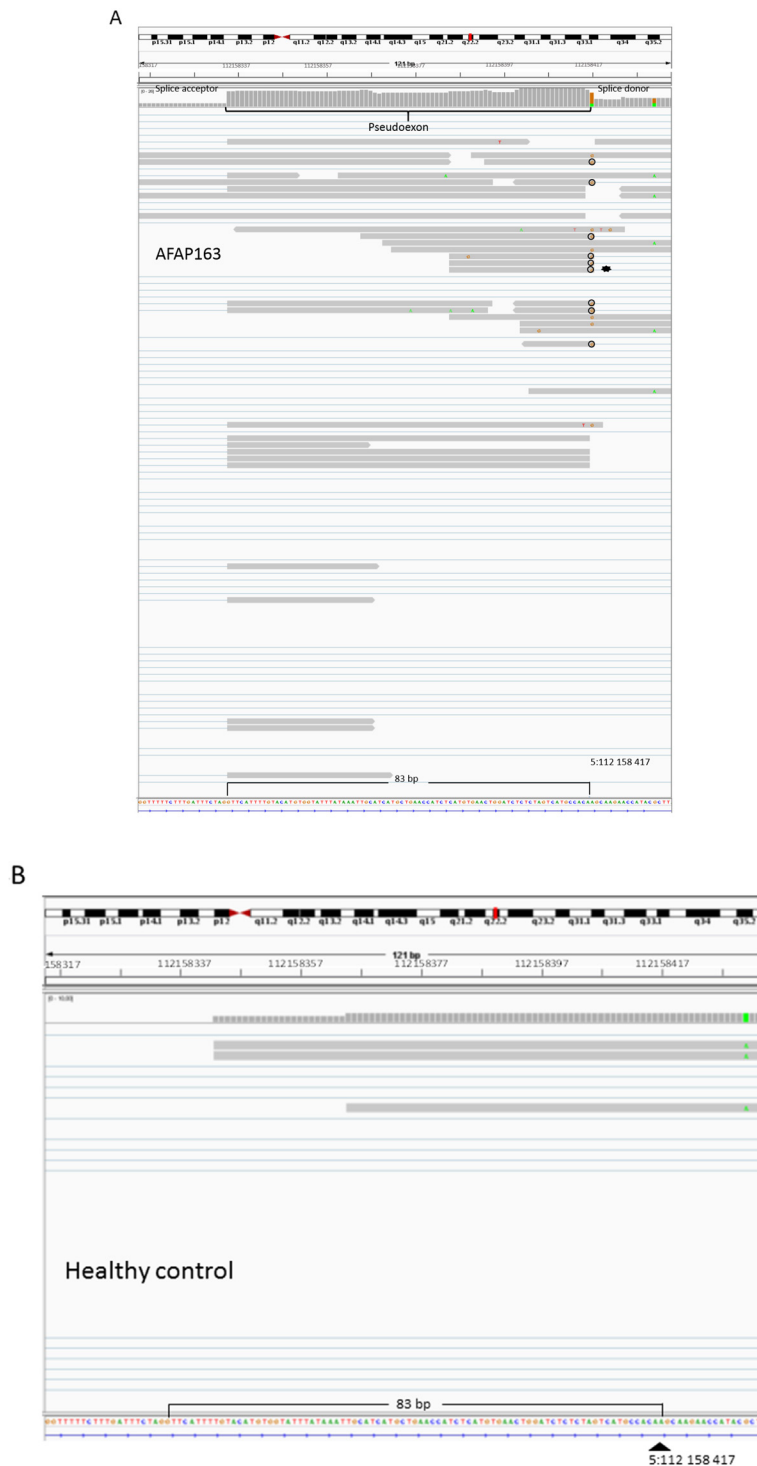

**Supplementary Figure S2: A pile-up IGV image of individual reads from RNA-seq for the index person from AFAP163 (Supplementary Figure S1A) and healthy control (Supplementary Figure S2B).** The figure provides a pile-up display of the same data that was given in a Sashimi plot format in Figure 2B. The borders of the 83-bp pseudoexon are indicated. AFAP163 shows 25 reads specific for the pseudoexon, 16 of which are associated with the splice acceptor and 9 associated with the splice donor. In the latter 9 reads, position 5:112158417, the site of the deep intronic mutation (Figure 5), constitutes the 3' end (circled). In all cases (9/9, 100%), this position is occupied by the variant nucleotide (G). The result is in agreement with our cloning experiment for fragment ex11 – ex13 where all pseudoexon-containing cDNA clones (8/8, 100%) revealed G in this position. The asterisk denotes the single pseudoexon-specific transcript that was accompanied by a 54-bp insertion (see Figure 2B; the 54-bp insertion is located beyond the area of display of Supplementary Figure S2). No pseudoexon-specific RNA reads exist in a healthy control individual (Supplementary Figure S2B).

Supplementary Table S1: Primers for sequencing analysis of *APC* in cDNA and gDNA

| Fragment designation  | Template | Forward (5')           | Reverse (5')             | Length (bp) | Reference          |
|-----------------------|----------|------------------------|--------------------------|-------------|--------------------|
| Fragment 1            | cDNA     | TCTGTACCACCCTCAGTTCTG  | GCAAGAAGCAATGACCTCTCT    | 575         | Spier et al., 2012 |
| Fragment 2            | cDNA     | TCTGGAGAGTGCAGTCCTGTT  | CCTTGGTTCCCAGATGACTTG    | 615         | Spier et al., 2012 |
| Fragment 3            | cDNA     | GTGGGAGAAATCAACATGGCA  | CCCATACATTTACAGTCCAC     | 665         | Spier et al., 2012 |
| Fragment 4            | cDNA     | CAGATCTGTCCTGCTGTGTGT  | AGTGCACCATCTACAGCACAT    | 505         | Spier et al., 2012 |
| Fragment 5            | cDNA     | GACGTTGCGAGAAGTTGGAAG  | CAAGCTTGAGCCAGGAGACAT    | 564         | Spier et al., 2012 |
| <i>APC</i> exon 11-13 | cDNA     | CTGTCCTGCTGTGTGTGTTTC  | GCTCTCATGCAGCCTTTCAT     | 246         | This study         |
| <i>APC</i> intron 6   | gDNA     | GGCCAGAGTGGTCTCAATCTT  | CCTAAATACAATGCCTTCATGCCT | 200         | This study         |
| <i>APC</i> intron 11  | gDNA     | TGGTTTTTCTTTGATTTCTAGG | AACATAAACGGCACAAAAAG     | 171         | This study         |

Supplementary Table S2: ASE results based on RNA-seq data (StringTie) vs. SNUPE.

See Supplementary File 1

Supplementary Table S3: Performance characteristics for RNA-seq and ASE analysis

|           | Read pairs (M) | Trimmed reads (M) | Properly mapped read (M) | Variants (total) | Accepted variants |
|-----------|----------------|-------------------|--------------------------|------------------|-------------------|
| FAP42     | 136,33         | 118,08            | 96,75                    | 43050            | 18677             |
| FAP85-1   | 81,92          | 71,36             | 64,76                    | 40225            | 17678             |
| FAP85-2   | 137,36         | 118,79            | 91,54                    | 46675            | 20898             |
| FAP85-3   | 142,75         | 124,73            | 96,22                    | 42378            | 20569             |
| AFAP163   | 110,07         | 90,53             | 86,51                    | 123772           | 31517             |
| FAP103    | 73,82          | 65,07             | 50,50                    | 22786            | 11285             |
| FAP3      | 96,38          | 82,44             | 73,13                    | 10697            | 5444              |
| FAP63     | 131,01         | 105,59            | 101,59                   | 35225            | 18382             |
| FAP93     | 75,38          | 67,70             | 65,10                    | 12631            | 5862              |
| control 1 | 116,78         | 93,12             | 88,06                    | 34048            | 17229             |
| control 2 | 102,88         | 70,22             | 67,63                    | 26591            | 14291             |
| control 3 | 115,45         | 94,38             | 90,50                    | 138787           | 34587             |

Supplementary Table S4: Performance characteristics for WGS

| FAP case | VCP-version | Genome size (bp) | Mean genome coverage | Number of reads before processing | Quality trimmed reads | Number of reads after PCR duplicates removed | Read length (bp) | Number of SNV variants | Number of indel variants |
|----------|-------------|------------------|----------------------|-----------------------------------|-----------------------|----------------------------------------------|------------------|------------------------|--------------------------|
| 85-1     | 2,5         | 3095693981       | 16,2                 | 745445432                         | 97675851              | 12781568                                     | 93               | 3915997                | 419413                   |
| 85-2     | 2,5         | 3095693981       | 13,7                 | 612121114                         | 79371793              | 10438636                                     | 93               | 4105808                | 404041                   |
| 85-3     | 2,5         | 3095693981       | 7,2                  | 345078096                         | 44707929              | 4332537                                      | 93               | 3893147                | 312047                   |
| 42       | 3,1         | 3095693981       | 8,1                  | 373104720                         | 57382420              | 7472734                                      | 125              | 3916556                | 324401                   |
| 103      | 3,1         | 3095693981       | 7,2                  | 341827692                         | 57408228              | 6270309                                      | 125              | 3800895                | 308643                   |
